# Supplementary material for: A gain‐of‐function mutation in microRNA 142 is sufficient to cause the development of T‐cell leukemia in mice
Source: PubMed Central journal article supplement — Cancer Sci. 2023 Apr 3;114(7):2821–34. doi: 10.1111/cas.15794 (PMC10323092; doi:10.1111/cas.15794), 2023-04-03
Supplement: CAS-114-2821-s003.pdf [file CAS-114-2821-s003.pdf]

Figure S2 : More information of miR-142-55A>G CD8+T-cell Leukemia analysis and Representative FACS plots.

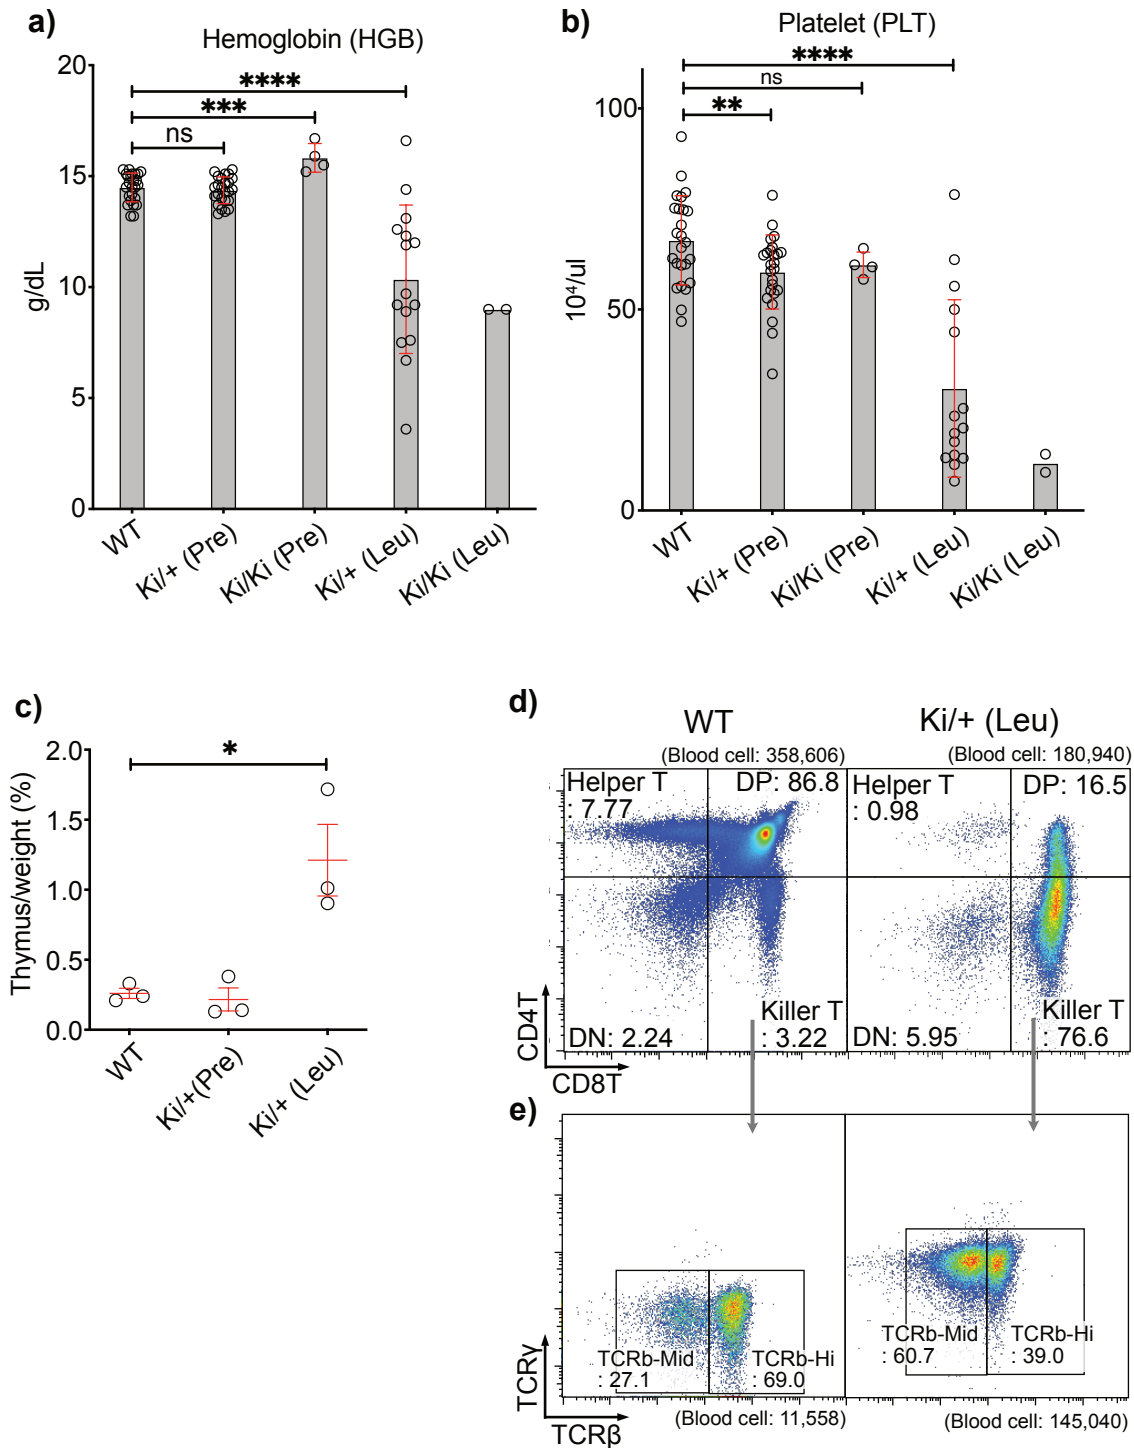

a, b) Hemoglobin and platelet counts from the complete blood counts (CBCs) in the peripheral blood (PB) of the WT, Ki/+ (Pre), and Ki/Ki (Pre) mice (n = 4–27) at 2 months post-transplantation, moribund Ki/+ (Leu) mice (n = 15), and moribund Ki/Ki (Leu) mice (n = 2).

c) Relative thymus weight of the WT, Ki/+ (Pre), (n = 3) mice 2 months after transplantation, and of the moribund primary transplantation Ki/+ (Leu) (n = 3) mice at the time of sacrifice.

d) Representative FACS plots showing the proportion of CD4<sup>+</sup> T- and CD8<sup>+</sup> T-cells in the WT (left panel) or Ki/+ (Leu) (right panel) from recipients of the transplanted BMs.

e) Representative FACS plots showing the proportion of T-cell receptors (TCRs) in the WT (left panel) or Ki/+ (Leu) (right panel) from recipients of the transplanted bone marrows.
