# Supplementary material for: A gain‐of‐function mutation in microRNA 142 is sufficient to cause the development of T‐cell leukemia in mice
Source: PubMed Central journal article supplement — Cancer Sci. 2023 Apr 3;114(7):2821–34. doi: 10.1111/cas.15794 (PMC10323092; doi:10.1111/cas.15794), 2023-04-03
Supplement: CAS-114-2821-s007.pdf [file CAS-114-2821-s007.pdf]

Figure S3 : TCR repertoire analysis of the T-cells in leukemic Ki/+ mice.

a)

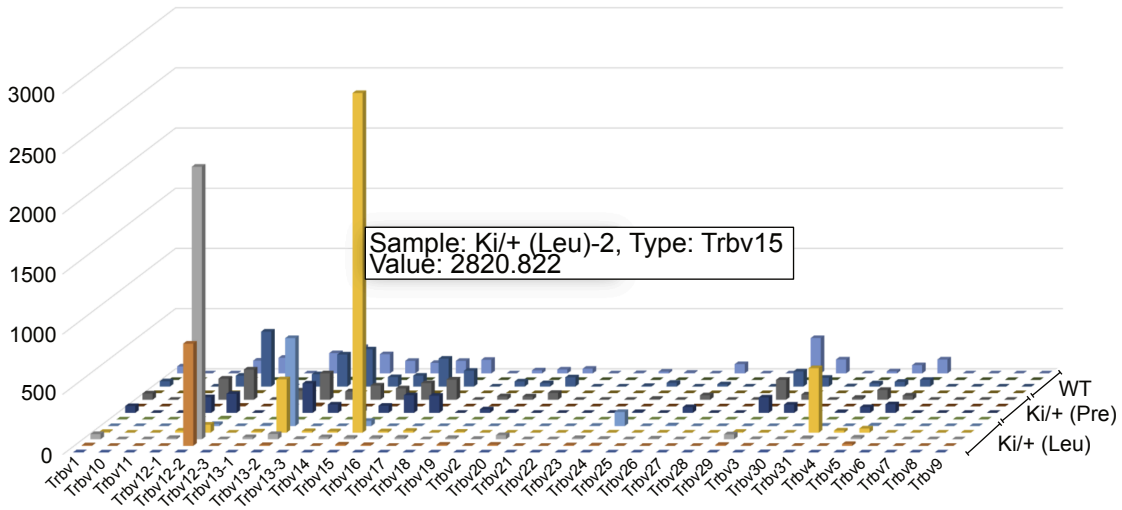

b)

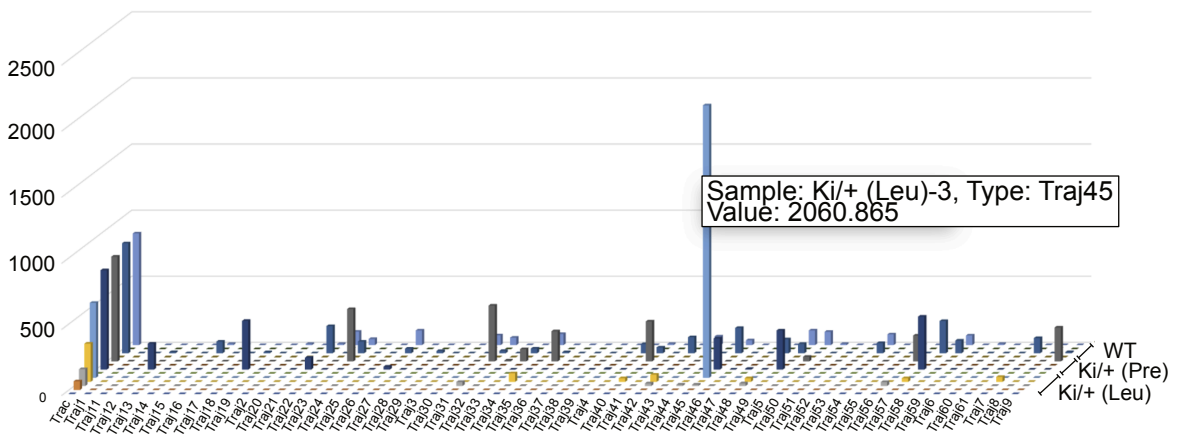

a, b) Skyscraper plots showing Vβ/Vα and matching Jβ/Jα in WT (n = 2), Ki/+(Pre) (n = 2), and Ki/+ (Leu) (n = 3).
