# Supplementary material for: A gain‐of‐function mutation in microRNA 142 is sufficient to cause the development of T‐cell leukemia in mice
Source: PubMed Central journal article supplement — Cancer Sci. 2023 Apr 3;114(7):2821–34. doi: 10.1111/cas.15794 (PMC10323092; doi:10.1111/cas.15794), 2023-04-03
Supplement: CAS-114-2821-s010.pdf [file CAS-114-2821-s010.pdf]

Figure S1 : Predicted hairpin structure of miR-142s and comparison of miR-142s expression

**a) miR-142 55A (WT) folding**

Start Position: 1, End Position: 83  
Sequence Size: 83 nucleotides  
Minimum Free Energy: -41.9 kcal/ mol

Sequence:  
ACAGUGCAGUCGCCAUAAAGUAGAAAGCACUACUACAGCUGGAGG  
GUGUAGUGUUUCCUACUUUAUGGAGAGUGUACUGU

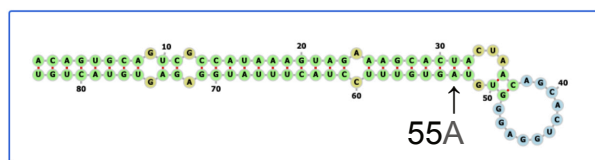

**b) miR-142 55A>G folding**

Start Position: 1, End Position: 83  
Sequence Size: 83 nucleotides  
Minimum Free Energy: -41.6 kcal/ mol

Sequence:  
ACAGUGCAGUCGCCAUAAAGUAGAAAGCACUACUACAGCUGGAGG  
GUGUGGUGUUUCCUACUUUAUGGAGAGUGUACUGU

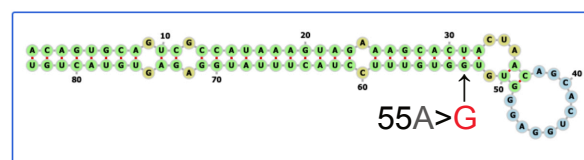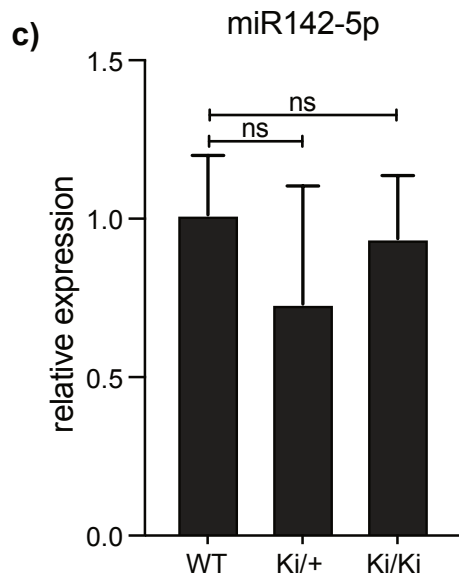

a, b) miRNAFold is the identification of large-scale microRNA precursors in the genome and quickly and sensitively predicts microRNA hairpin structures. The hairpin structure for the miR-142-55A sequence is shown in (a) and the miR-142-55A>G sequence in (b).

c) miR-142-5p expression in bone marrow of 2-month-old mice (n = 3-4).
