# Supplementary material for: A gain‐of‐function mutation in microRNA 142 is sufficient to cause the development of T‐cell leukemia in mice
Source: PubMed Central journal article supplement — Cancer Sci. 2023 Apr 3;114(7):2821–34. doi: 10.1111/cas.15794 (PMC10323092; doi:10.1111/cas.15794), 2023-04-03
Supplement: CAS-114-2821-s012.pdf [file CAS-114-2821-s012.pdf]

Figure S5: Additional RNA sequencing data for the WT, Ki/+ (Pre), and Ki/+ (Leu).

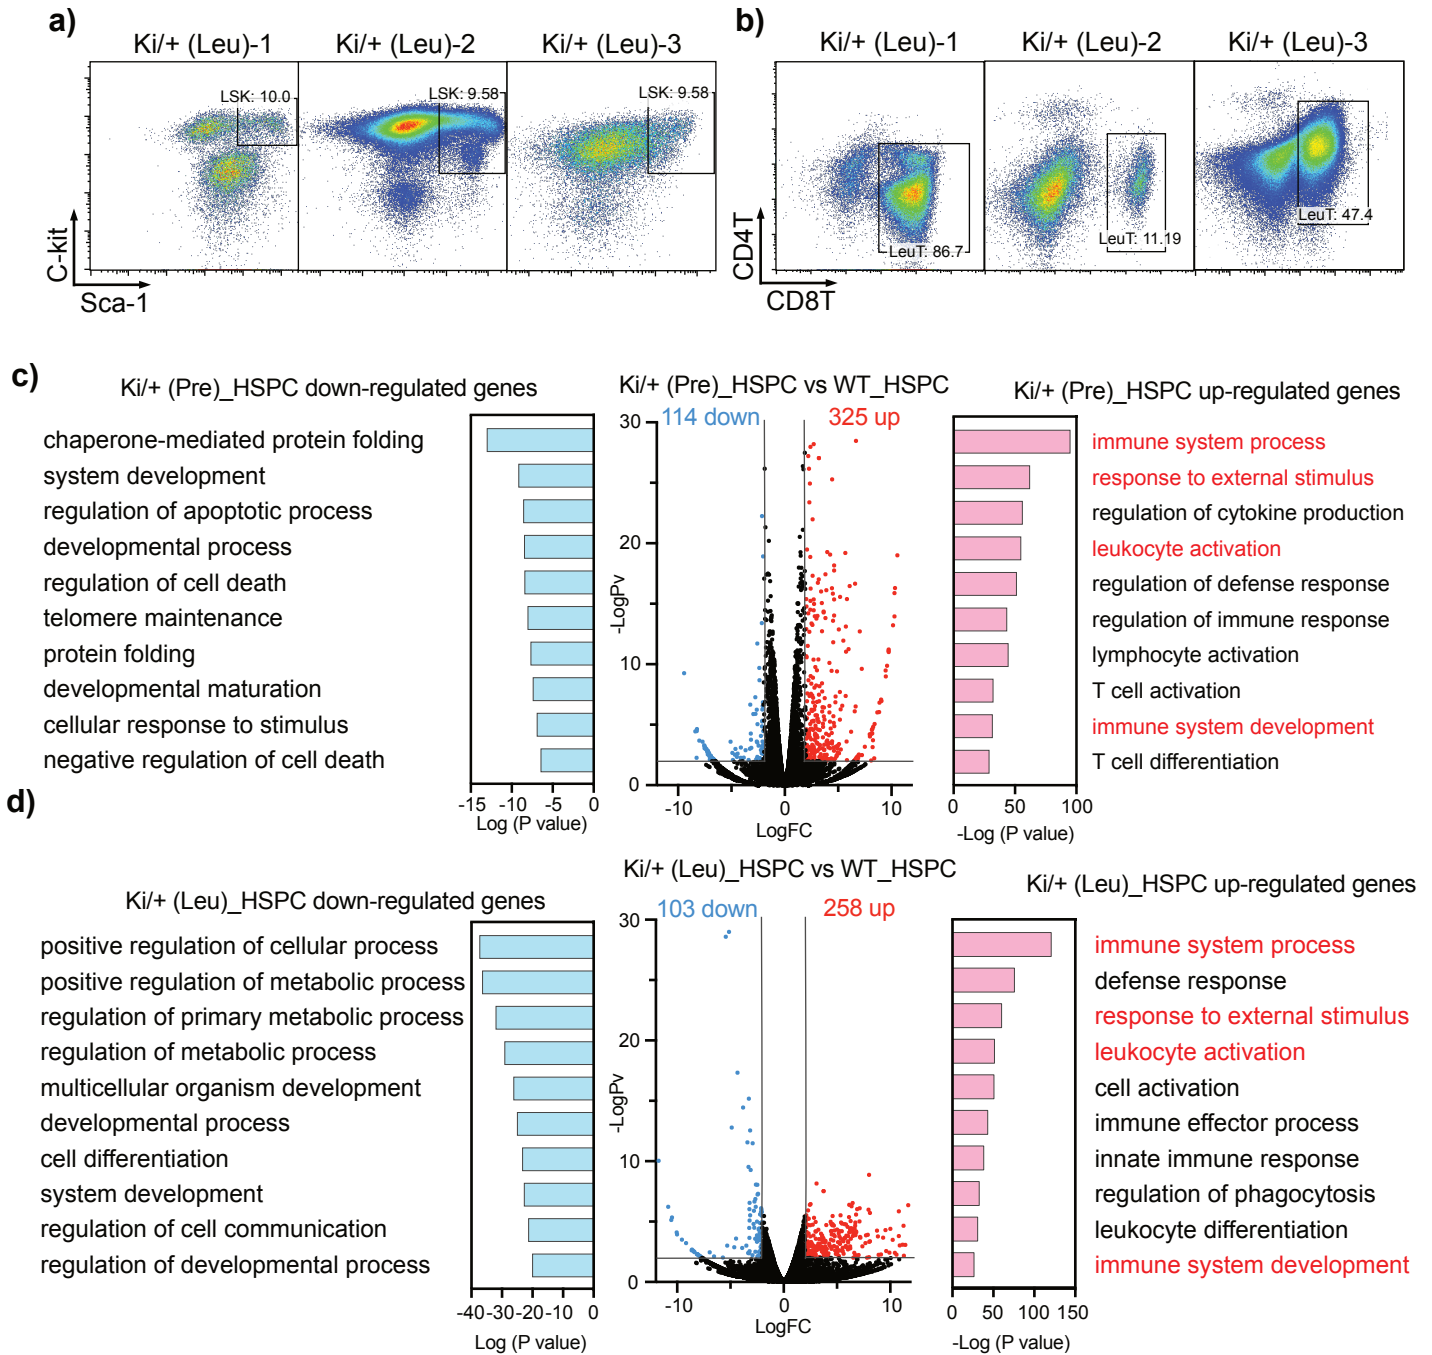

a,b) Representative FACS plots showing the HSPCs (a) and CD8<sup>+</sup> T-cells (b) collected for RNA-seq in Ki/+ (Leu) from the recipients of the transplanted bone marrows (BMs).

c, d) Volcano plot showing differentially expressed genes (DEGs) in Ki/+ (Pre)\_T cells versus WT\_T-cells (c), Ki/+ (Pre)\_HSPCs versus WT\_HSPCs (d), and Ki/+ (Leu)\_HSPCs versus WT\_HSPCs (e) ( $P < 0.05$  colored dots, WT  $n = 2$ , Ki/+ (Pre)  $n = 2$ , Ki/+ (Leu)  $n = 3$ ).

f) Venn diagram showing the overlapping up- and down-regulated genes in Ki/+ (Pre)\_HSPC (yellow), Ki/+ (Leu)\_HSPC (pink), and Ki/+ (Leu)\_T (green) mice compared to the WT. Representative gene clusters (c) and (d) were subjected to GO analysis. Terms commonly elevated in Ki/+(Pre) and Ki/+(Leu) are noted in red text.
